# Supplementary material for: Synthesis of Lignosulfonate-Based Dispersants for Application in Concrete Formulations
Source: MDPI journal article supplement (doi:10.3390/ma14237388), 2021-12-02
Supplement: s1 [file s1]

## Supplementary Materials

### Synthesis of Lignosulfonate-Based Dispersants for Application in Concrete Formulations

Sandra Magina, Ana Barros-Timmons, Dmitry V. Evtuguin\*

CICECO-Aveiro Institute of Materials and Chemistry Department, University of Aveiro, Campus de Santiago, P-3810-193 Aveiro, Portugal

\* Corresponding author: Dmitry V. Evtuguin (e-mail: dmitrye@ua.pt)

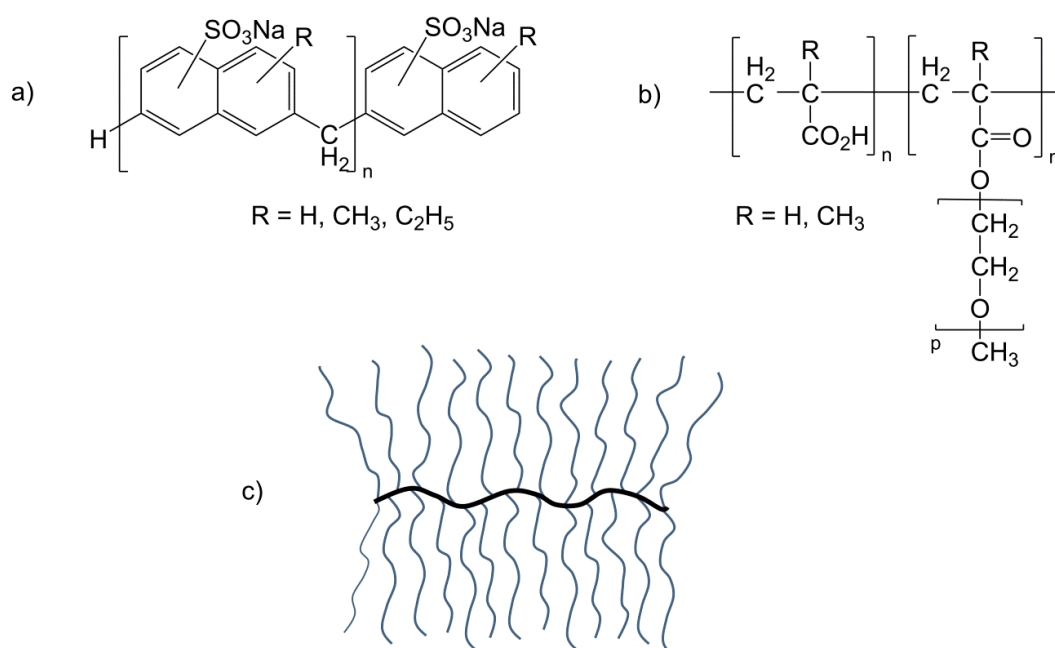

**Figure S1.** Chemical structure of superplasticizers: NSF (a) and example of PCE (b); molecular architecture of a comb-like PCE superplasticizer (c).

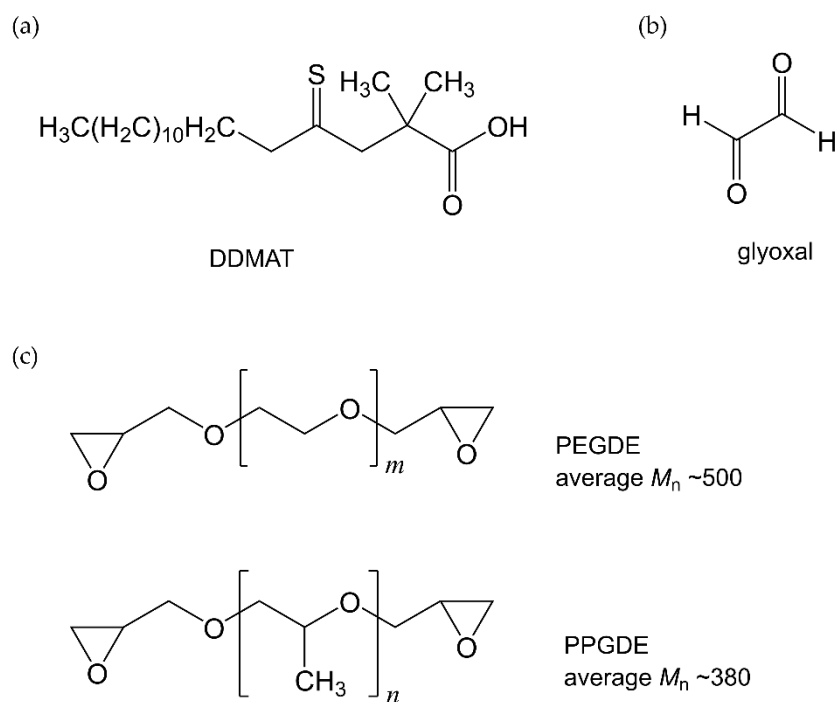

**Figure S2.** Structure of chemical species used in this study for LS modification: RAFT agent, DDMAT (a), glyoxal (b) and epoxidized oligomers derivatives, PEGDE and PPGDE (c).

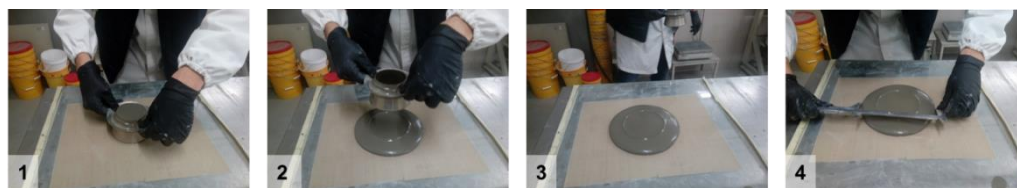

**Figure S3.** Flow table test: spreading of cement paste.
